# Supplementary material
Source: PubMed Central journal article supplement (PMC7472746)

## Supplementary Material:

# Atheroma-specific lipids in *ldlr*<sup>-/-</sup> and *apoe*<sup>-/-</sup> mice using 2D and 3D matrix-assisted laser desorption/ionization mass spectrometry imaging

Jianhua Cao,<sup>1</sup> Pieter Goossens,<sup>2</sup> Marta Martin-Lorenzo,<sup>1</sup> Frédéric Dewez,<sup>1,3</sup> Britt S. R. Claes,<sup>1</sup> Erik A. L. Biessen,<sup>2</sup> Ron M.A. Heeren,<sup>1</sup> and Benjamin Balluff<sup>1</sup>

<sup>1</sup> Maastricht Multimodal Molecular Imaging Institute (M4I), Maastricht University, Maastricht, The Netherlands

<sup>2</sup> Maastricht UMC+, Pathology Department, Cardiovascular Research Institute Maastricht (CARIM), Maastricht, The Netherlands

<sup>3</sup> Mass Spectrometry Laboratory (MSLab), University of Liège, Liège, Belgium

**Supplementary Table 1.** Plaque specific *m/z* species (n = 33) and corresponding correlation coefficients in the *ldlr*<sup>-/-</sup> mouse model.

| Observed <i>m/z</i> by TOF | Pearson correlation coefficient | Observed <i>m/z</i> by Orbitrap | Lipid assignment                                                        | MS experiment level for ID | Ion mode | Mass error (in ppm) |
|----------------------------|---------------------------------|---------------------------------|-------------------------------------------------------------------------|----------------------------|----------|---------------------|
|                            | <i>ldlr</i> <sup>-/-</sup>      |                                 |                                                                         |                            |          |                     |
| 409.3                      | 0.47                            | 409.2366                        | [LPA 16:0-H] <sup>-</sup>                                               | MS1                        | NEG      | +1.3                |
| 435.3                      | 0.50                            | 435.2522                        | [LPA 18:1-H] <sup>-</sup>                                               | MS1                        | NEG      | +1.1                |
| 436.3                      | 0.42                            | 436.2833                        | [LPE O-16:1-H] <sup>-</sup>                                             | MS1                        | NEG      | +1.0                |
| 437.3                      | 0.43                            | 437.2679                        | [LPA 18:0-H] <sup>-</sup>                                               | MS1                        | NEG      | +1.2                |
| 459.2                      | 0.50                            | 459.2476                        | [LPA 18:1+Na] <sup>+</sup>                                              | MS1                        | POS      | -1.3                |
| 463.3                      | 0.41                            | 463.2839                        | [LPA 20:1-H] <sup>-</sup>                                               | MS1                        | NEG      | +1.9                |
| 464.3                      | 0.44                            | 464.3142                        | [LPE O-18:1-H] <sup>-</sup>                                             | MS1                        | NEG      | -1.0                |
| 470.9                      | 0.59                            | /                               | /                                                                       | /                          | POS      | /                   |
| 480.3                      | 0.52                            | 480.3099                        | [LPE 18:0-H] <sup>-</sup> /<br>[LPC 16:0-CH <sub>3</sub> ] <sup>-</sup> | MS2                        | NEG      | +0.6                |
| 481.0                      | 0.52                            | /                               | /                                                                       | /                          | POS      | /                   |
| 482.3                      | 0.55                            | 482.3600                        | [LPC O-16:0+H] <sup>+</sup> /<br>[LPE O-19:0+H] <sup>+</sup>            | MS1                        | POS      | -1.0                |
| 487.3                      | 0.47                            | 487.2790                        | [LPA 20:1+Na] <sup>+</sup>                                              | MS1                        | POS      | -1.0                |
| 496.3                      | 0.58                            | 496.3398                        | [LPC 16:0+H] <sup>+</sup>                                               | MS2                        | POS      | +0.0                |
| 496.6                      | 0.60                            | /                               | /                                                                       | /                          | POS      | /                   |
| 498.7                      | 0.55                            | /                               | /                                                                       | /                          | POS      | /                   |
| 506.3                      | 0.43                            | 506.3257                        | [LPC 18:1-CH <sub>3</sub> ] <sup>-</sup> /<br>[LPE 20:1-H] <sup>-</sup> | MS1                        | NEG      | +1.0                |
| 510.4                      | 0.59                            | 510.3554                        | [LPC 17:0+H] <sup>+</sup> /<br>[LPE 20:0+H] <sup>+</sup>                | MS1                        | POS      | +0.0                |
| 518.3                      | 0.59                            | 518.3216                        | [LPC 16:0+Na] <sup>+</sup>                                              | MS2                        | POS      | -0.2                |
| 520.3                      | 0.63                            | 520.3400                        | [LPC 18:2+H] <sup>+</sup>                                               | MS2                        | POS      | +0.4                |
| 522.4                      | 0.56                            | 522.3557                        | [LPC 18:1+H] <sup>+</sup>                                               | MS2                        | POS      | +0.6                |
| 524.4                      | 0.45                            | 524.3717                        | [LPC 18:0+H] <sup>+</sup>                                               | MS2                        | POS      | +1.1                |
| 524.6                      | 0.48                            | /                               | /                                                                       | /                          | POS      | /                   |
| 534.3                      | 0.57                            | 534.2951                        | [LPC 16:0+K] <sup>+</sup>                                               | MS2                        | POS      | -0.9                |
| 538.4                      | 0.43                            | 538.3862                        | [LPC 19:0+H] <sup>+</sup> /<br>[LPE 22:0+H] <sup>+</sup>                | MS1                        | POS      | -1.0                |
| 542.4                      | 0.58                            | 542.3213                        | [LPC 18:2+Na] <sup>+</sup>                                              | MS1                        | POS      | -0.8                |
| 544.4                      | 0.59                            | 544.3389                        | [LPC 18:1+Na] <sup>+</sup>                                              | MS2                        | POS      | +2.8                |
| 546.4                      | 0.56                            | 546.3540                        | [LPC 18:0+Na] <sup>+</sup>                                              | MS2                        | POS      | +1.8                |
| 560.3                      | 0.49                            | 560.3123                        | [LPC 18:1+K] <sup>+</sup>                                               | MS2                        | POS      | +0.0                |
| 562.3                      | 0.49                            | 562.3278                        | [LPC 18:0+K] <sup>+</sup>                                               | MS2                        | POS      | +0.0                |
| 599.3                      | 0.41                            | 599.3216                        | [LPI 18:0-H] <sup>-</sup>                                               | MS2                        | NEG      | +2.4                |
| 676.8                      | 0.42                            | /                               | /                                                                       | /                          | POS      | /                   |
| 689.6                      | 0.42                            | 689.5620                        | [SM d18:0_16:0-CH <sub>3</sub> ] <sup>-</sup>                           | MS2                        | NEG      | +0.7                |
| 727.6                      | 0.40                            | 727.5731                        | [SM 34:0;2+Na] <sup>+</sup>                                             | MS2                        | POS      | +1.0                |

**Supplementary Table 2.** Plaque specific m/z species (n = 43) and corresponding correlation coefficients in the *apoe*<sup>-/-</sup> mouse model.

| Observed m/z by TOF | Pearson correlation coefficient | Observed m/z by Orbitrap | Lipid assignment                                                        | MS experiment level for ID | Ion mode | Mass error (in ppm) |
|---------------------|---------------------------------|--------------------------|-------------------------------------------------------------------------|----------------------------|----------|---------------------|
|                     | <i>apoe</i> <sup>-/-</sup>      |                          |                                                                         |                            |          |                     |
| 409.3               | 0.61                            | 409.2366                 | [LPA 16:0-H] <sup>-</sup>                                               | MS1                        | NEG      | +1.3                |
| 459.2               | 0.46                            | 459.2476                 | [LPA 18:1+Na] <sup>+</sup>                                              | MS1                        | POS      | -1.3                |
| 463.3               | 0.54                            | 463.2839                 | [LPA 20:1-H] <sup>-</sup>                                               | MS1                        | NEG      | +1.9                |
| 464.3               | 0.59                            | 464.3142                 | [LPE O-18:1-H] <sup>-</sup>                                             | MS1                        | NEG      | -1.0                |
| 480.3               | 0.62                            | 480.3099                 | [LPE 18:0-H] <sup>-</sup> /<br>[LPC 16:0-CH <sub>3</sub> ] <sup>-</sup> | MS2                        | NEG      | +0.6                |
| 481.3               | 0.57                            | 481.3000                 | /                                                                       | /                          | NEG      | /                   |
| 482.3               | 0.50                            | 482.3600                 | [LPC O-16:0+H] <sup>+</sup> /<br>[LPE O-19:0+H] <sup>+</sup>            | MS1                        | POS      | -1.0                |
| 487.3               | 0.44                            | 487.2790                 | [LPA 20:1+Na] <sup>+</sup>                                              | MS1                        | POS      | -1.0                |
| 496.3               | 0.62                            | 496.3398                 | [LPC 16:0+H] <sup>+</sup>                                               | MS2                        | POS      | +0.0                |
| 496.6               | 0.49                            | /                        | /                                                                       | /                          | POS      | /                   |
| 506.3               | 0.41                            | 506.3257                 | [LPC 18:1-CH <sub>3</sub> ] <sup>-</sup> /<br>[LPE 20:1-H] <sup>-</sup> | MS1                        | NEG      | +1.0                |
| 508.3               | 0.58                            | 508.3411                 | [LPC 18:0-CH <sub>3</sub> ] <sup>-</sup>                                | MS2                        | NEG      | +0.4                |
| 510.4               | 0.55                            | 510.3554                 | [LPC 17:0+H] <sup>+</sup> /<br>[LPE 20:0+H] <sup>+</sup>                | MS1                        | POS      | +0.0                |
| 518.3               | 0.63                            | 518.3216                 | [LPC 16:0+Na] <sup>+</sup>                                              | MS2                        | POS      | -0.2                |
| 520.3               | 0.63                            | 520.3400                 | [LPC 18:2+H] <sup>+</sup>                                               | MS2                        | POS      | +0.4                |
| 522.4               | 0.59                            | 522.3557                 | [LPC 18:1+H] <sup>+</sup>                                               | MS2                        | POS      | +0.6                |
| 524.4               | 0.52                            | 524.3717                 | [LPC 18:0+H] <sup>+</sup>                                               | MS2                        | POS      | +1.1                |
| 534.3               | 0.57                            | 534.2951                 | [LPC 16:0+K] <sup>+</sup>                                               | MS2                        | POS      | -0.9                |
| 538.4               | 0.53                            | 538.3862                 | [LPC 19:0+H] <sup>+</sup> /<br>[LPE 22:0+H] <sup>+</sup>                | MS1                        | POS      | -1.0                |
| 542.4               | 0.57                            | 542.3213                 | [LPC 18:2+Na] <sup>+</sup>                                              | MS1                        | POS      | -0.8                |
| 544.4               | 0.57                            | 544.3389                 | [LPC 18:1+Na] <sup>+</sup>                                              | MS2                        | POS      | +2.8                |
| 546.4               | 0.49                            | 546.3540                 | [LPC 18:0+Na] <sup>+</sup>                                              | MS2                        | POS      | +1.8                |
| 560.3               | 0.45                            | 560.3123                 | [LPC 18:1+K] <sup>+</sup>                                               | MS2                        | POS      | +0.0                |
| 562.3               | 0.49                            | 562.3278                 | [LPC 18:0+K] <sup>+</sup>                                               | MS2                        | POS      | +0.0                |
| 574.5               | 0.57                            | 574.4520                 | /                                                                       | /                          | NEG      | /                   |
| 588.5               | 0.53                            | 588.4678                 | /                                                                       | /                          | NEG      | /                   |
| 590.4               | 0.48                            | 590.4471                 | /                                                                       | /                          | NEG      | /                   |
| 599.3               | 0.52                            | 599.3216                 | [LPI 18:0-H] <sup>-</sup>                                               | MS2                        | NEG      | +2.4                |
| 602.5               | 0.52                            | 602.4836                 | /                                                                       | /                          | NEG      | /                   |
| 604.5               | 0.54                            | 604.4628                 | /                                                                       | /                          | NEG      | /                   |
| 616.5               | 0.51                            | 616.4722                 | [CerP 34:1;2-H] <sup>-</sup>                                            | MS1                        | NEG      | +1.7                |
| 618.5               | 0.54                            | 618.4877                 | [CerP 34:0;2-H] <sup>-</sup>                                            | MS1                        | NEG      | +1.5                |
| 619.3               | 0.49                            | 619.2895                 | [LPI 20:4-H] <sup>-</sup>                                               | MS2                        | NEG      | +0.7                |
| 642.5               | 0.52                            | 642.4881                 | [CerP 36:2;2-H] <sup>-</sup>                                            | MS1                        | NEG      | +2.0                |
| 644.5               | 0.43                            | 644.5038                 | [CerP 36:1;2-H] <sup>-</sup>                                            | MS1                        | NEG      | +2.1                |
| 676.5               | 0.42                            | /                        | /                                                                       | /                          | POS      | /                   |
| 687.6               | 0.52                            | 687.5462                 | [SM d18:1_16:0-CH <sub>3</sub> ] <sup>-</sup>                           | MS2                        | NEG      | +2.2                |
| 689.6               | 0.53                            | 689.5620                 | [SM d18:0_16:0-CH <sub>3</sub> ] <sup>-</sup>                           | MS2                        | NEG      | +0.7                |
| 727.6               | 0.44                            | 727.5731                 | [SM 34:0;2+Na] <sup>+</sup>                                             | MS2                        | POS      | +1.0                |

|       |      |          |                                                               |     |     |      |
|-------|------|----------|---------------------------------------------------------------|-----|-----|------|
| 795.6 | 0.42 | 795.6404 | /                                                             | /   | NEG | /    |
| 796.6 | 0.41 | 796.6438 | [ACer 50:6;4-H] <sup>-</sup>                                  | MS1 | NEG | -2.8 |
| 797.6 | 0.47 | 797.6561 | [CerPE 44:2;2-H] <sup>-</sup><br>/[EPC 44:2;2-H] <sup>-</sup> | MS1 | NEG | +2.4 |
| 799.7 | 0.43 | 799.6718 | [CerPE 44:1;2-H] <sup>-</sup><br>/[EPC 44:1;2-H] <sup>-</sup> | MS1 | NEG | +2.4 |

**Supplementary Table 3.** Plaque specific m/z species (n = 22) and corresponding correlation coefficients in the 3D *apoe*<sup>-/-</sup> mouse.

| Observed m/z by TOF | Lipid assignment                                                        | Pearson correlation coefficient |
|---------------------|-------------------------------------------------------------------------|---------------------------------|
| 459.2               | [LPA 18:1+Na] <sup>+</sup>                                              | 0.55                            |
| 463.3               | [LPA 20:1-H] <sup>-</sup>                                               | 0.48                            |
| 464.3               | [LPE O-18:1-H] <sup>-</sup>                                             | 0.63                            |
| 480.3               | [LPE 18:0-H] <sup>-</sup> /<br>[LPC 16:0-CH <sub>3</sub> ] <sup>-</sup> | 0.59                            |
| 487.3               | [LPA 20:1+Na] <sup>+</sup>                                              | 0.54                            |
| 496.3               | [LPC 16:0+H] <sup>+</sup>                                               | 0.53                            |
| 496.6               | /                                                                       | 0.53                            |
| 510.4               | [LPC 17:0+H] <sup>+</sup> /<br>[LPE 20:0+H] <sup>+</sup>                | 0.61                            |
| 518.3               | [LPC 16:0+Na] <sup>+</sup>                                              | 0.64                            |
| 520.3               | [LPC 18:2+H] <sup>+</sup>                                               | 0.60                            |
| 522.4               | [LPC 18:1+H] <sup>+</sup>                                               | 0.61                            |
| 524.4               | [LPC 18:0+H] <sup>+</sup>                                               | 0.41                            |
| 534.3               | [LPC 16:0+K] <sup>+</sup>                                               | 0.59                            |
| 538.4               | [LPC 19:0+H] <sup>+</sup> /<br>[LPE 22:0+H] <sup>+</sup>                | 0.58                            |
| 542.4               | [LPC 18:2+Na] <sup>+</sup>                                              | 0.63                            |
| 544.4               | [LPC 18:1+Na] <sup>+</sup>                                              | 0.60                            |
| 546.4               | [LPC 18:0+Na] <sup>+</sup>                                              | 0.60                            |
| 560.3               | [LPC 18:1+K] <sup>+</sup>                                               | 0.55                            |
| 562.3               | [LPC 18:0+K] <sup>+</sup>                                               | 0.52                            |
| 599.3               | [LPI 18:0-H] <sup>-</sup>                                               | 0.56                            |
| 689.6               | [SM d18:0_16:0-CH <sub>3</sub> ] <sup>-</sup>                           | 0.56                            |
| 727.6               | [SM 34:0;2+Na] <sup>+</sup>                                             | 0.58                            |

**Supplementary Fig. 1** Visualization of 10 plaque specific *m/z* species in found in 11 *ldlr*<sup>-/-</sup> mice in negative ion mode.

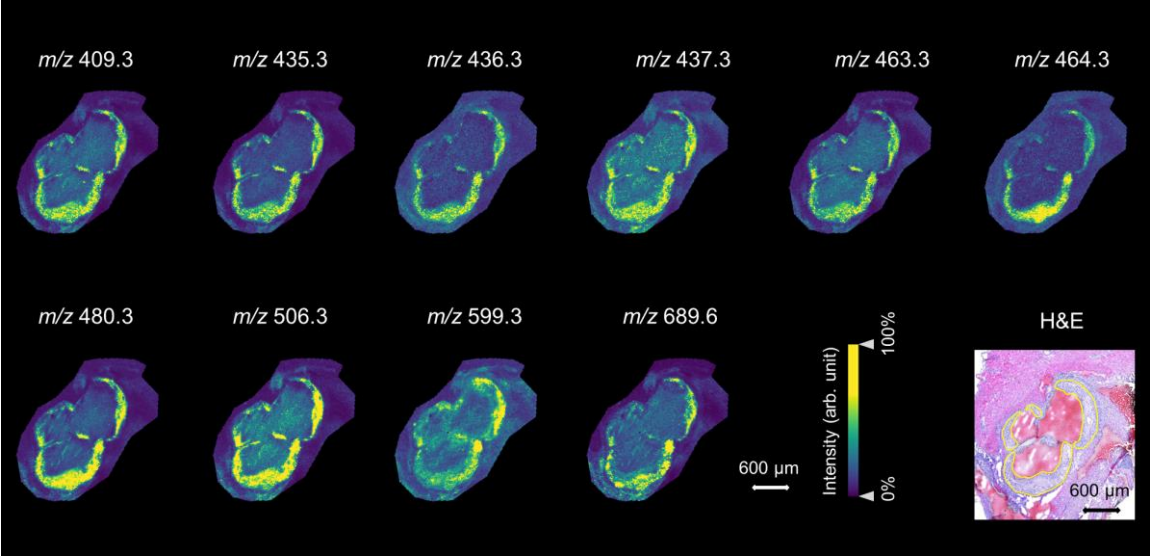

**Supplementary Fig. 2** Visualization of 23 plaque specific *m/z* species found in 4 *ldlr*<sup>-/-</sup> mice in positive ion mode.

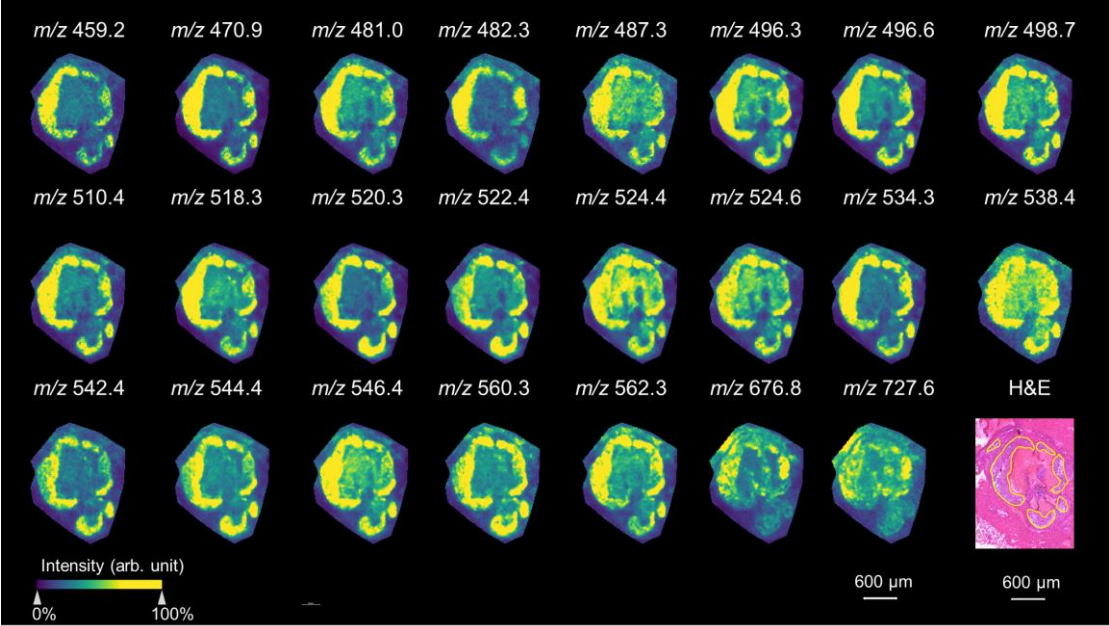

**Supplementary Fig. 3** Visualization of 24 plaque specific  $m/z$  species found in 4  $apoE^{-/-}$  mice in negative ion mode.

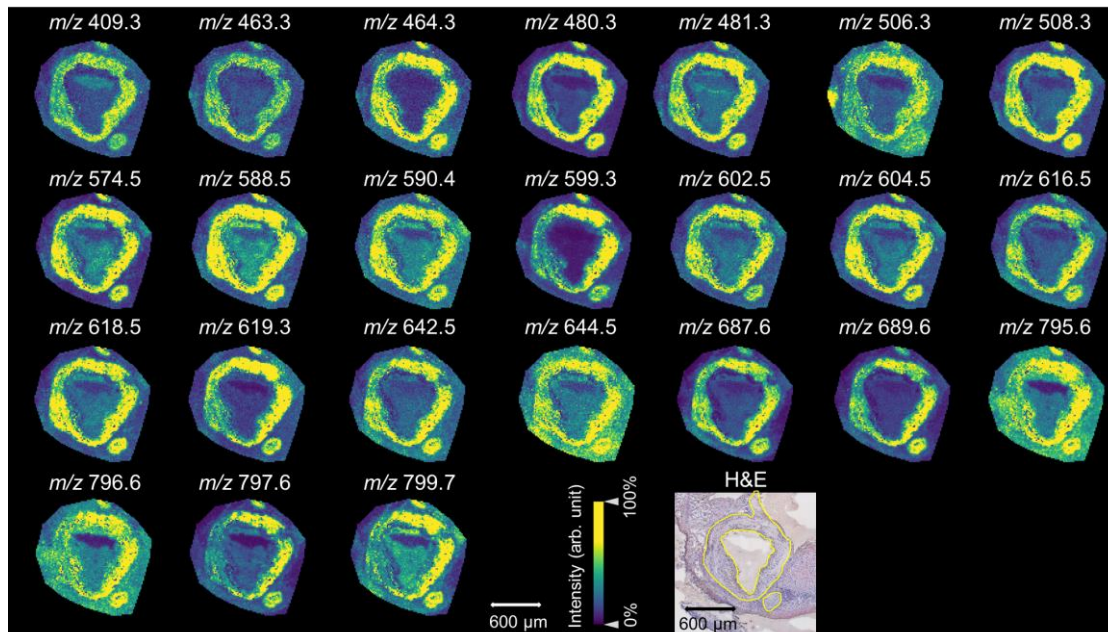



**Supplementary Fig. 4** Visualization of 19 plaque specific  $m/z$  species found in 4  $apoe^{-/-}$  mice in positive ion mode.

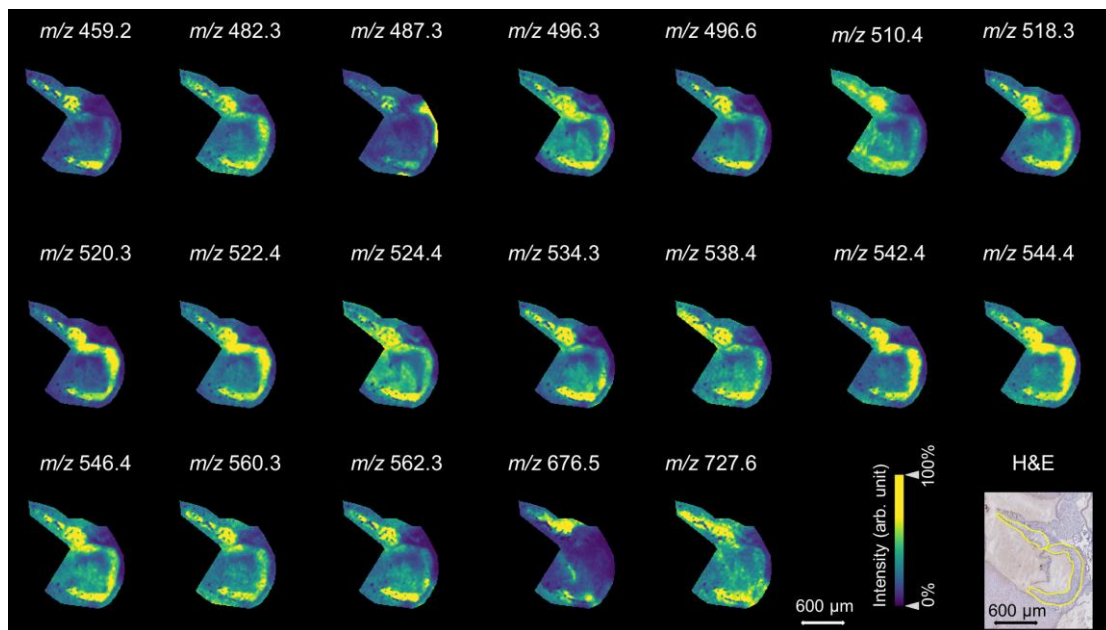

**Supplementary Fig. 5** MS/MS spectrum of  $m/z$  480.3099 ( $[\text{LPE } 18:0\text{-H}]^- / [\text{LPC } 16:0\text{-CH}_3]^-$ )

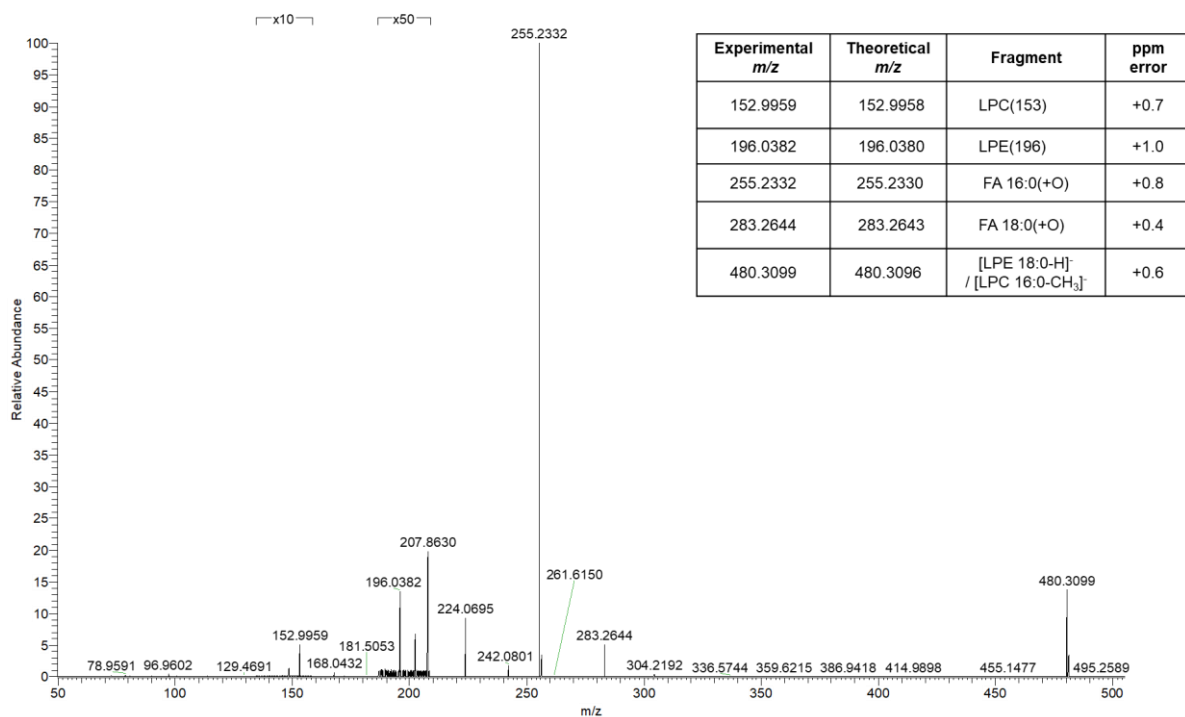

**Supplementary Fig. 6** MS/MS spectrum of  $m/z$  496.3398 ([LPC 16:0+H]<sup>+</sup>)

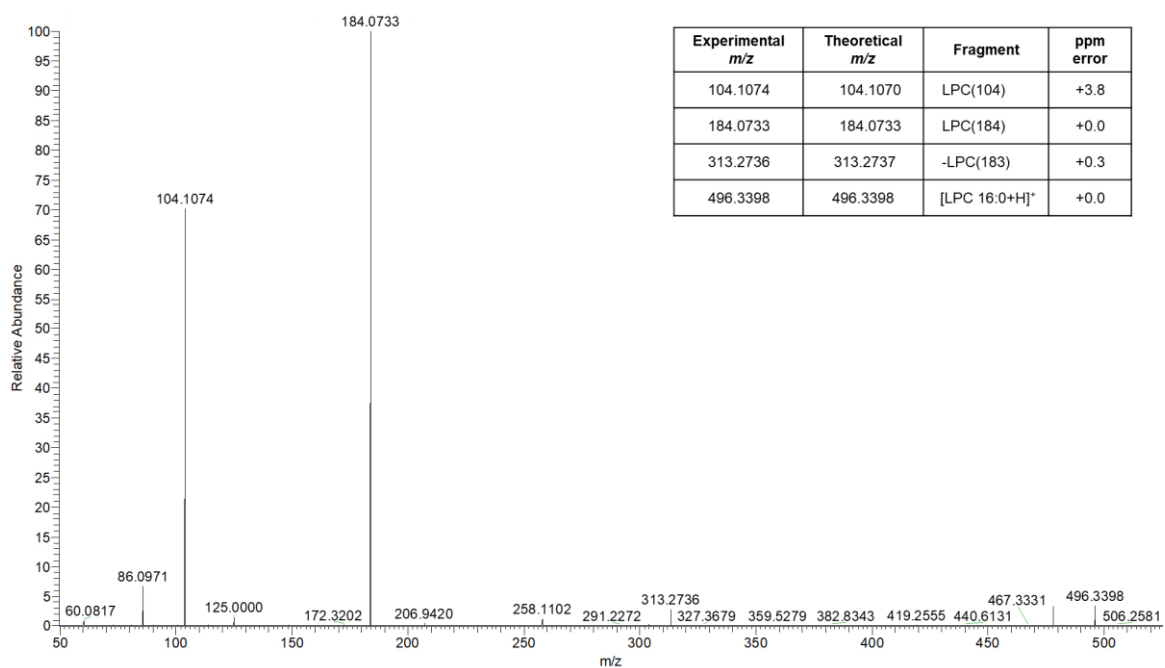

**Supplementary Fig. 7** MS/MS spectrum of m/z 508.3411 ([LPC 18:0-CH<sub>3</sub>]-)

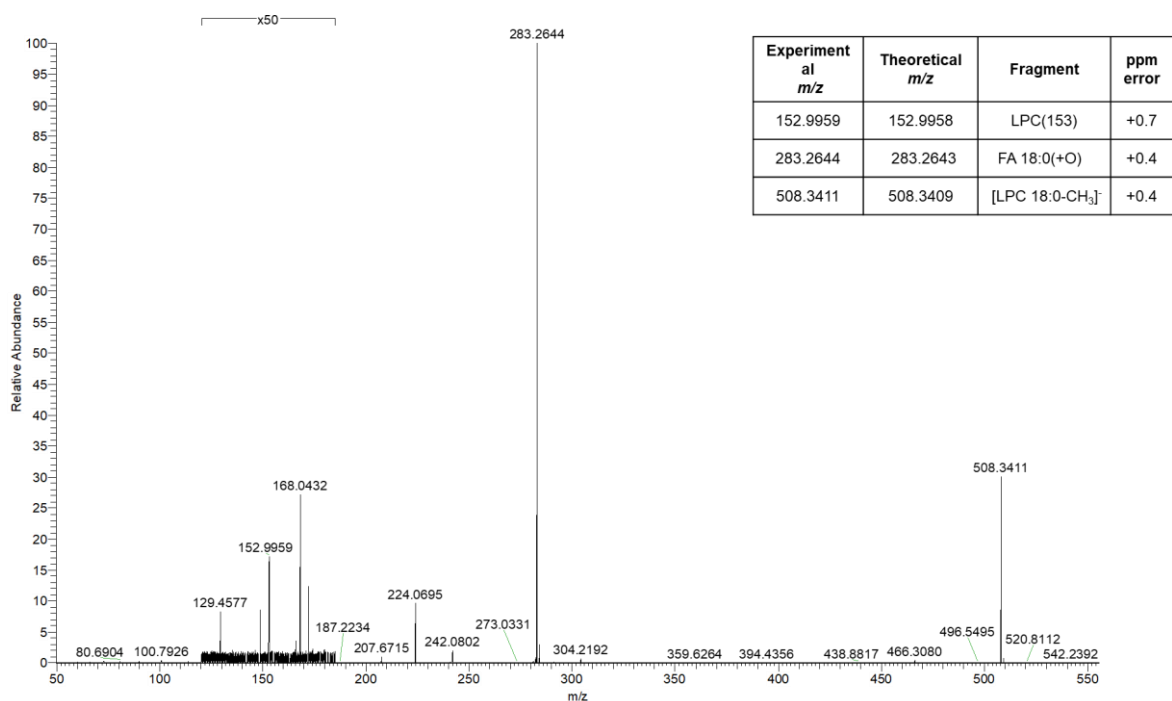

**Supplementary Fig. 8** MS/MS spectrum of m/z 518.3216 ([LPC 16:0+Na]<sup>+</sup>)

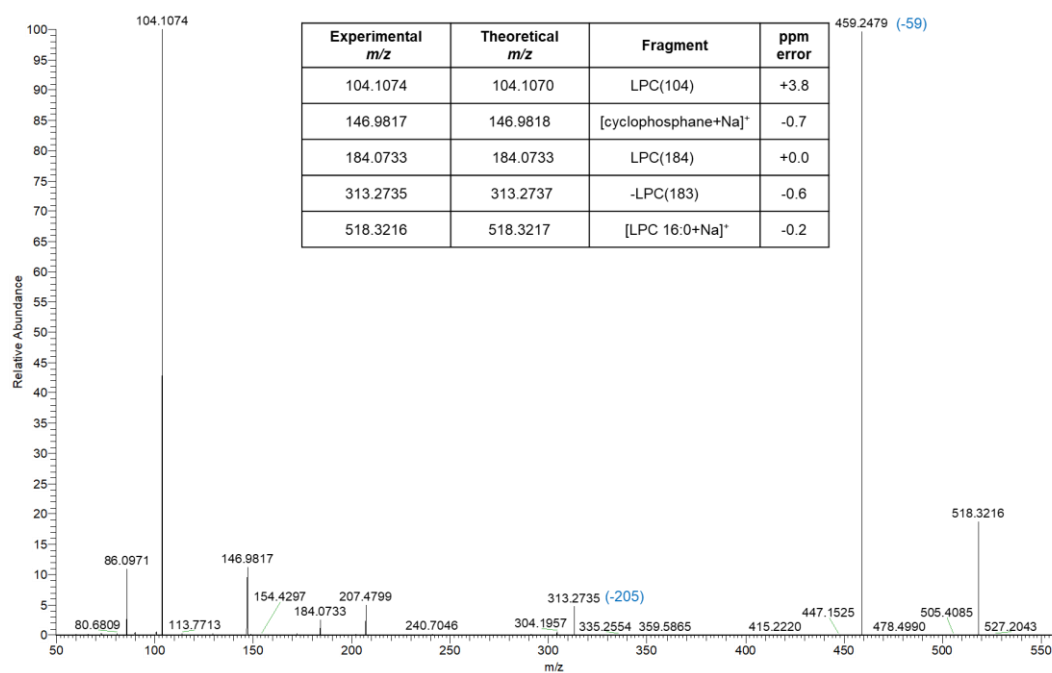

**Supplementary Fig. 9** MS/MS spectrum of m/z 520.3400 ([LPC 18:2+H]<sup>+</sup>)

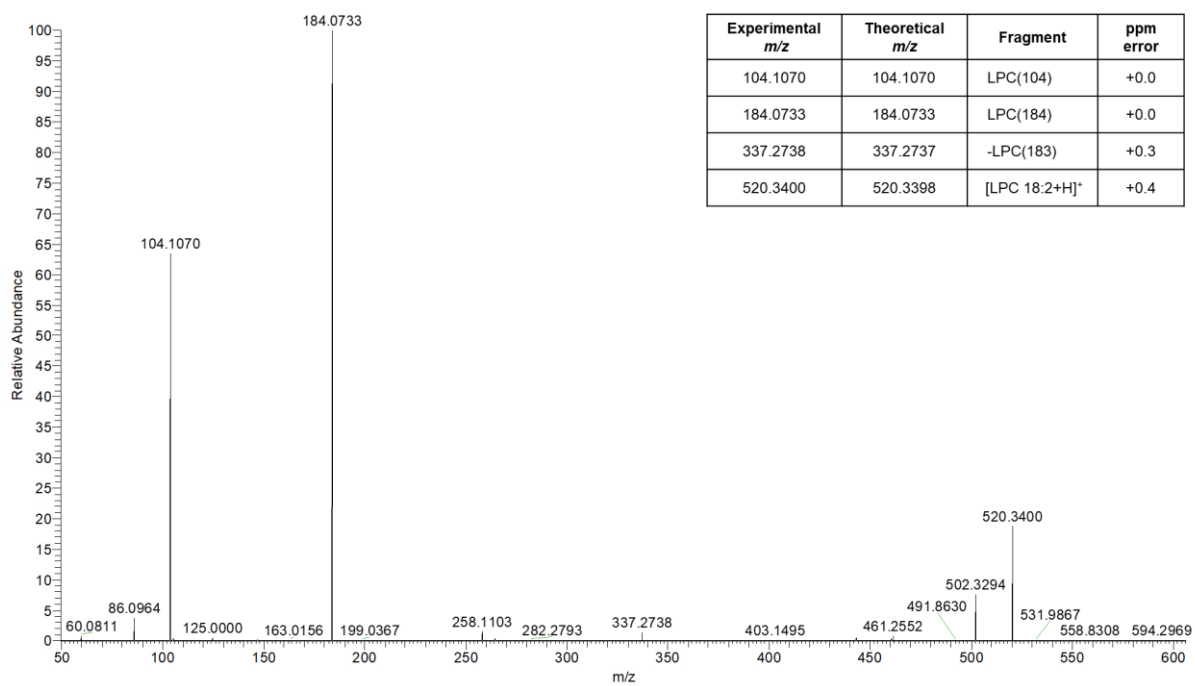

**Supplementary Fig. 10** MS/MS spectrum of  $m/z$  522.3557 ([LPC 18:1+H]<sup>+</sup>)

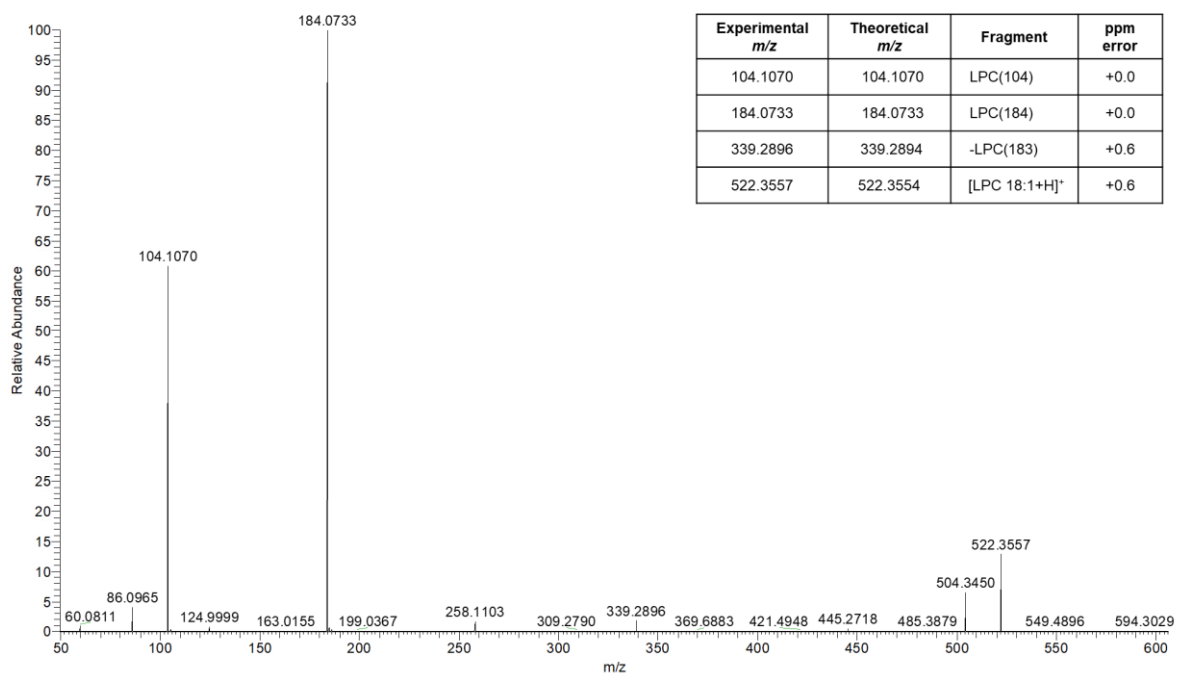

**Supplementary Fig. 11** MS/MS spectrum of  $m/z$  524.3717 ([LPC 18:0+H]<sup>+</sup>)

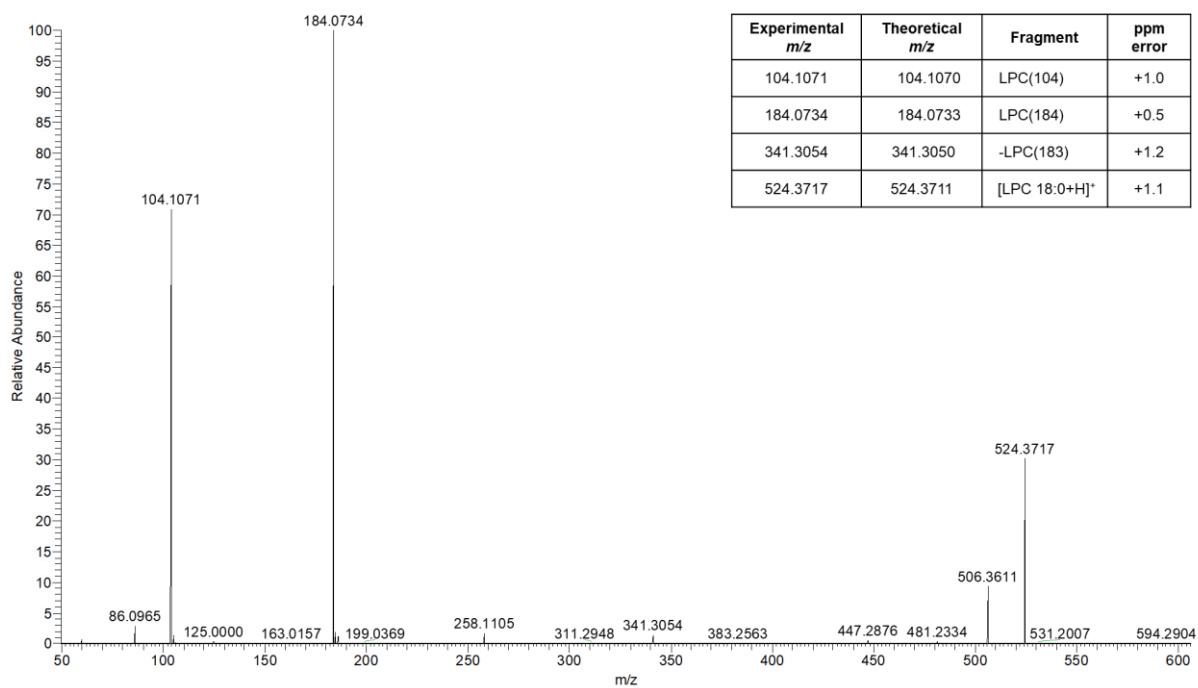



**Supplementary Fig. 12** MS/MS spectrum of m/z 534.2951 ([LPC 16:0+K]<sup>+</sup>)

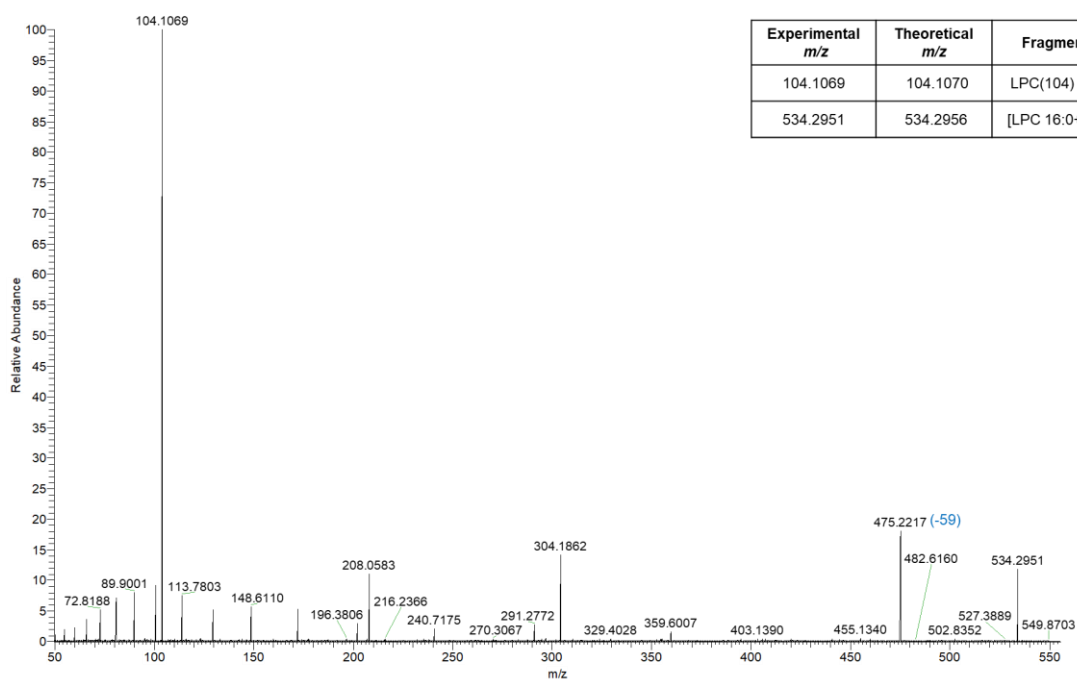

| Experimental m/z | Theoretical m/z | Fragment                  | ppm error |
|------------------|-----------------|---------------------------|-----------|
| 104.1069         | 104.1070        | LPC(104)                  | -1.0      |
| 534.2951         | 534.2956        | [LPC 16:0+K] <sup>+</sup> | -0.9      |

**Supplementary Fig. 13** MS/MS spectrum of  $m/z$  544.3389 ([LPC 18:1+Na]<sup>+</sup>)

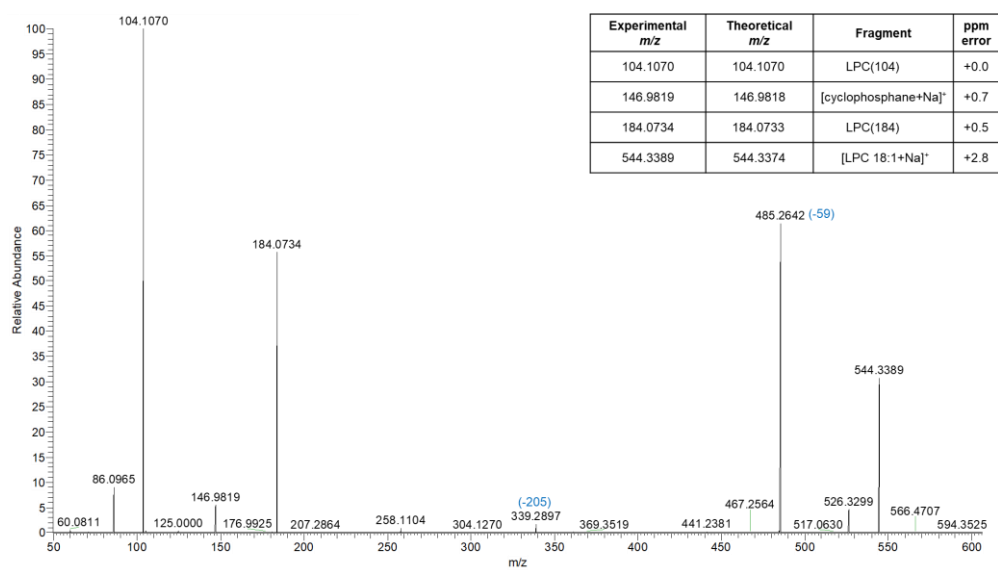

**Supplementary Fig. 14** MS/MS spectrum of m/z 546.3540 ([LPC 18:0+Na]<sup>+</sup>)

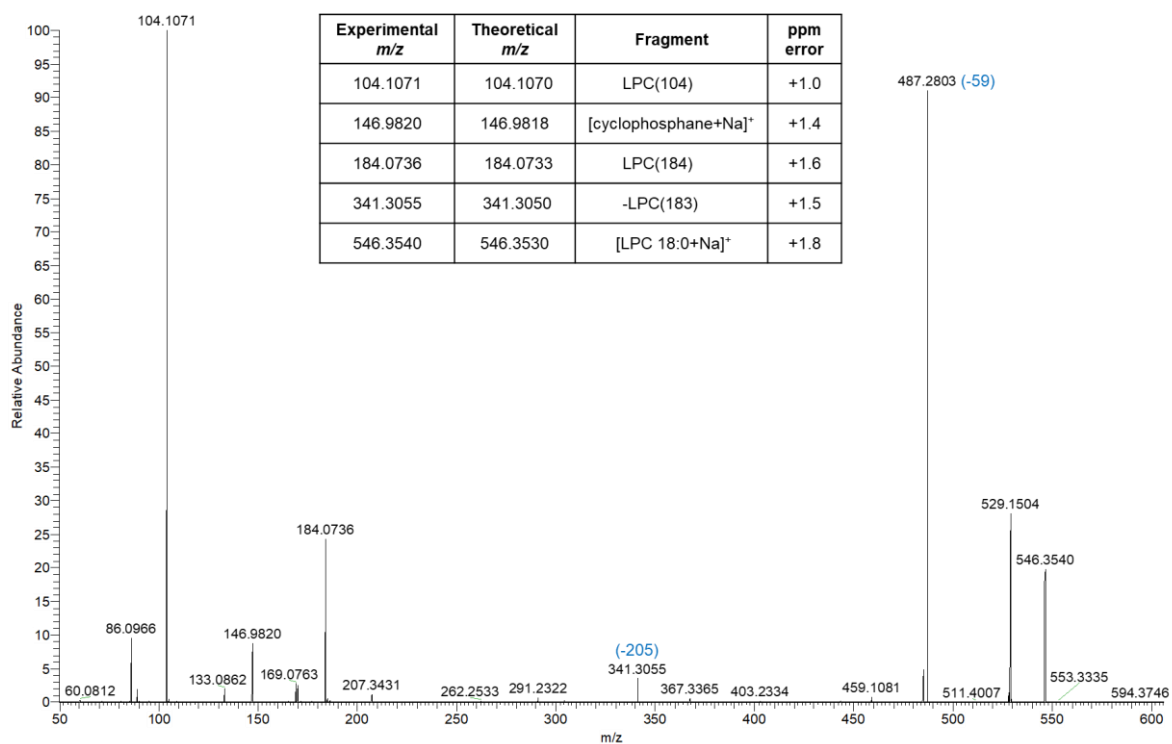

**Supplementary Fig. 15** MS/MS spectrum of m/z 560.3123 ([LPC 18:1+K]<sup>+</sup>)

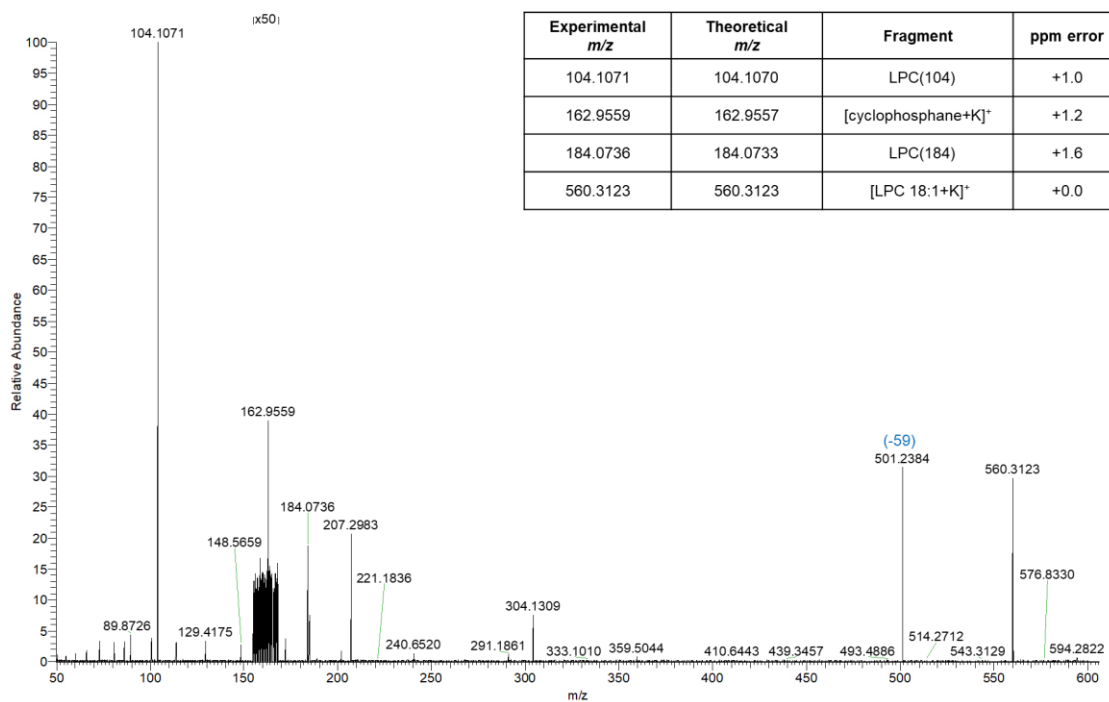

**Supplementary Fig. 16** MS/MS spectrum of  $m/z$  562.3278 ([LPC 18:0+K]<sup>+</sup>)

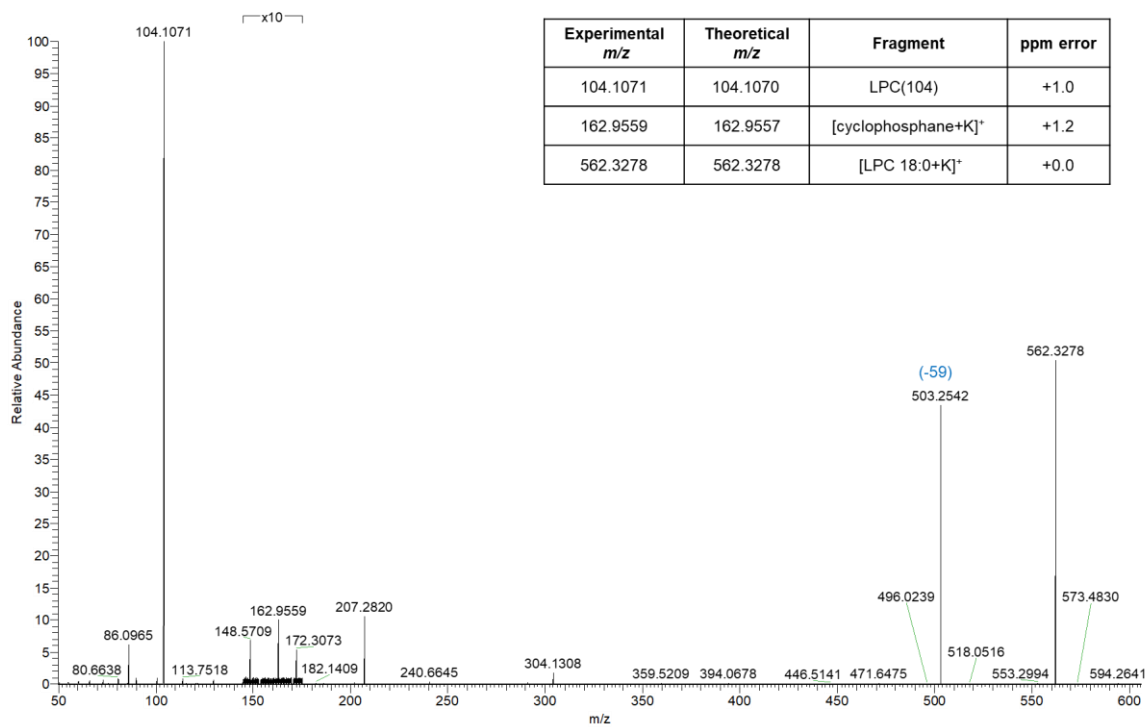

**Supplementary Fig. 17** MS/MS spectrum of m/z 599.3216 ([LPI 18:0-H]<sup>-</sup>)

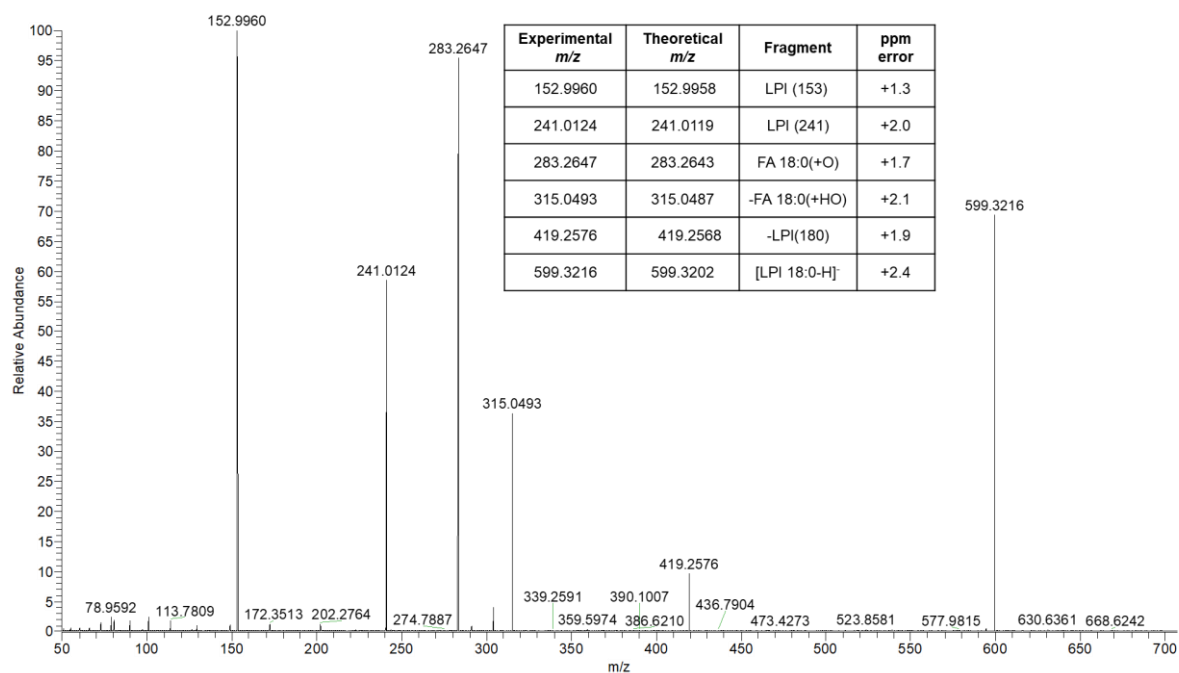

**Supplementary Fig. 18** MS/MS spectrum of  $m/z$  619.2895 ([LPI 20:4-H]<sup>-</sup>)

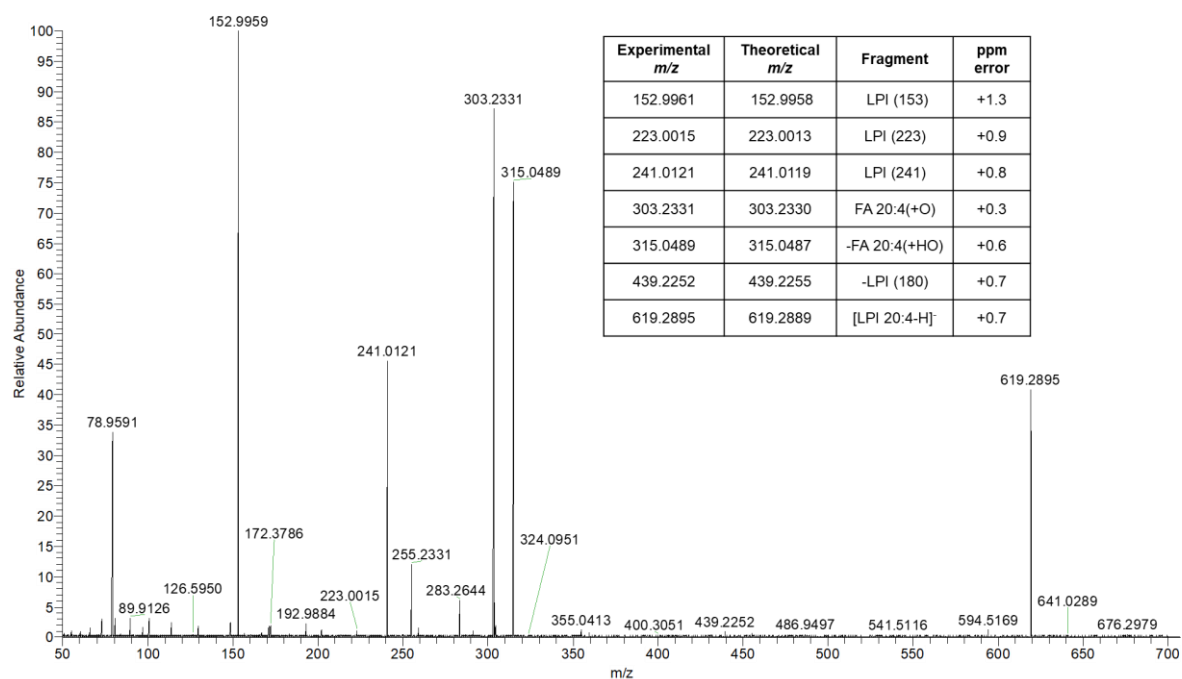

**Supplementary Fig. 19** MS/MS spectrum of  $m/z$  687.5462 ( $[\text{SM d18:1}_{16:0}\text{-CH}_3]^-$ )

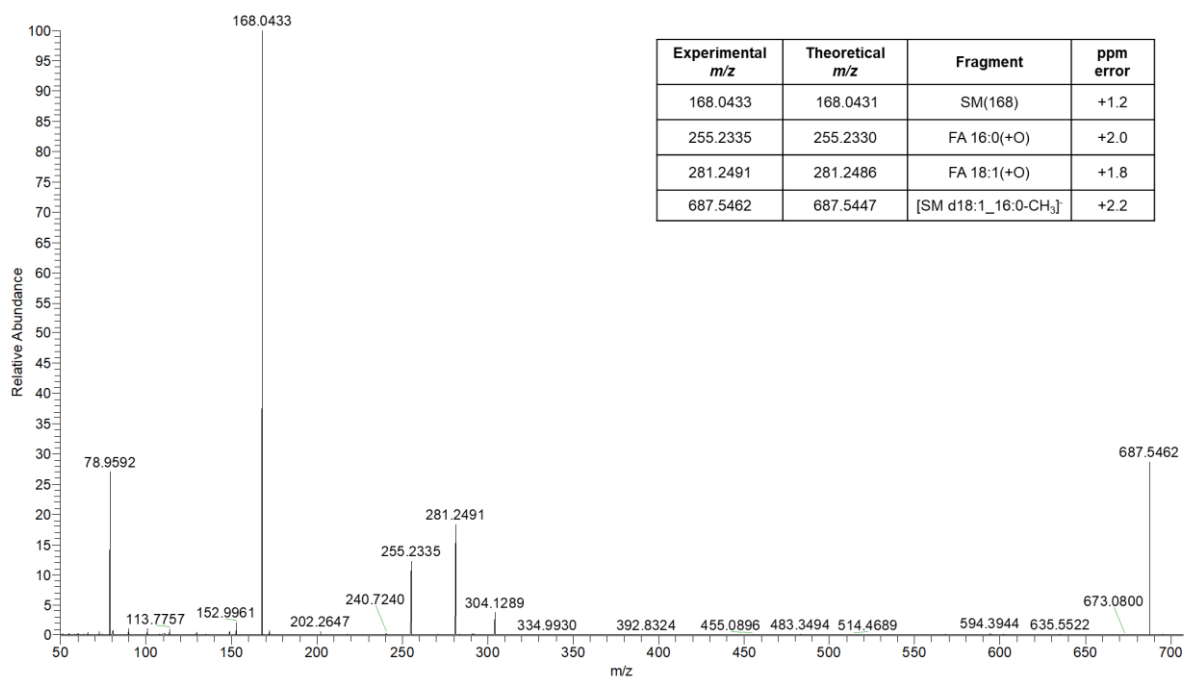



**Supplementary Fig. 20** MS/MS spectrum of  $m/z$  689.5620 ( $[\text{SM d18:0}_{16:0}\text{-CH}_3]^-$ )

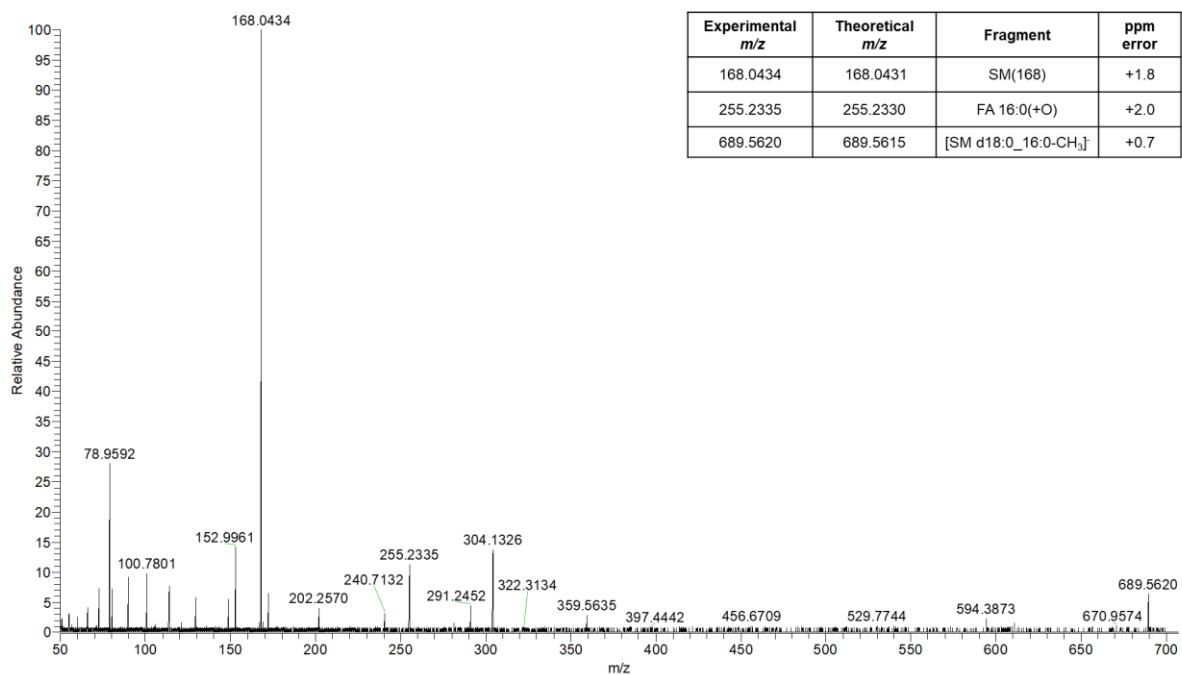

**Supplementary Fig. 21** MS/MS spectrum of m/z 725.5583 ([SM 34:1;2+Na]<sup>+</sup>)

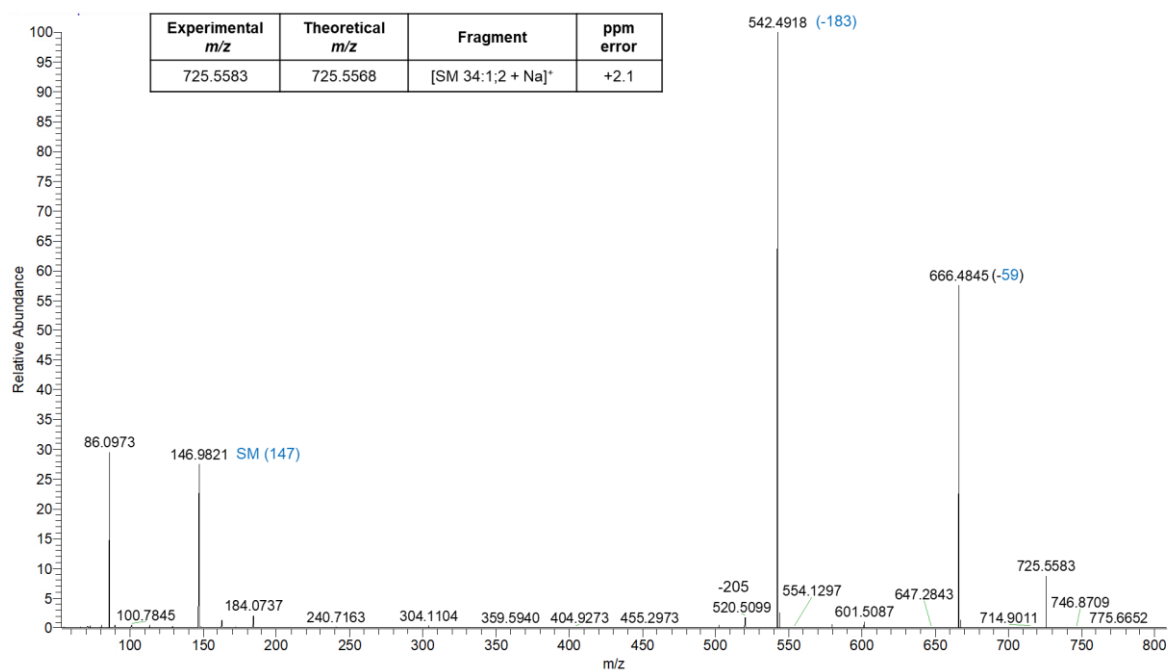

**Supplementary Fig. 22** MS/MS spectrum of  $m/z$  727.5731 ( $[SM\ 34:0;2+Na]^+$ )

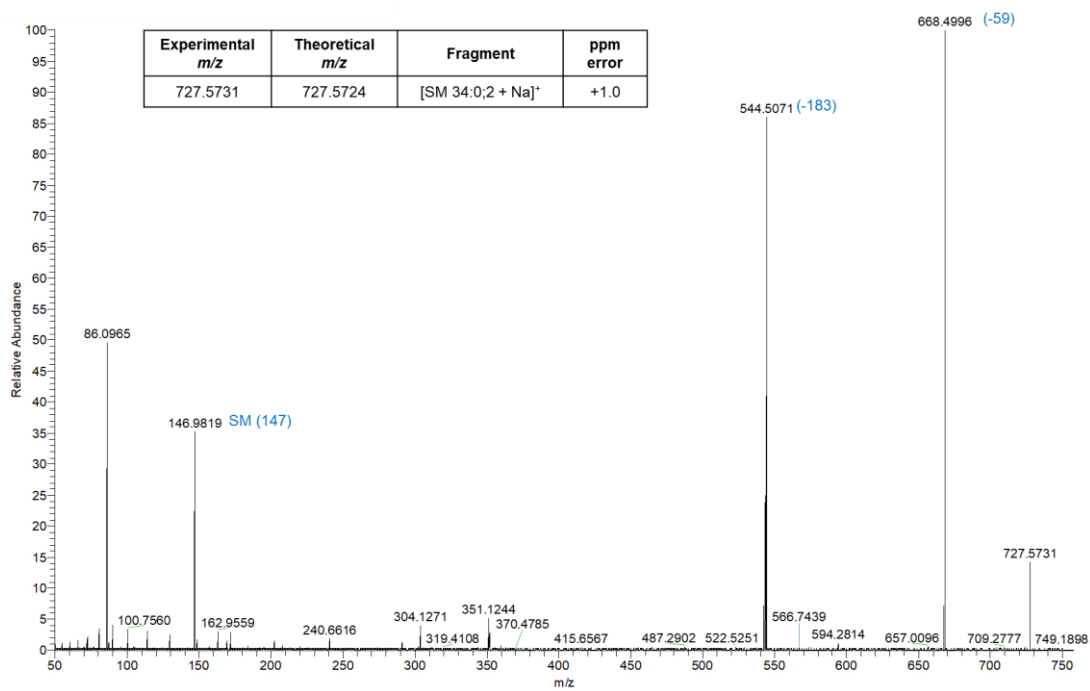

**Supplementary Fig. 23** Spatial correlation of all identified m/z species to the plaque area on a section-by-section basis in the 3D MSI experiment

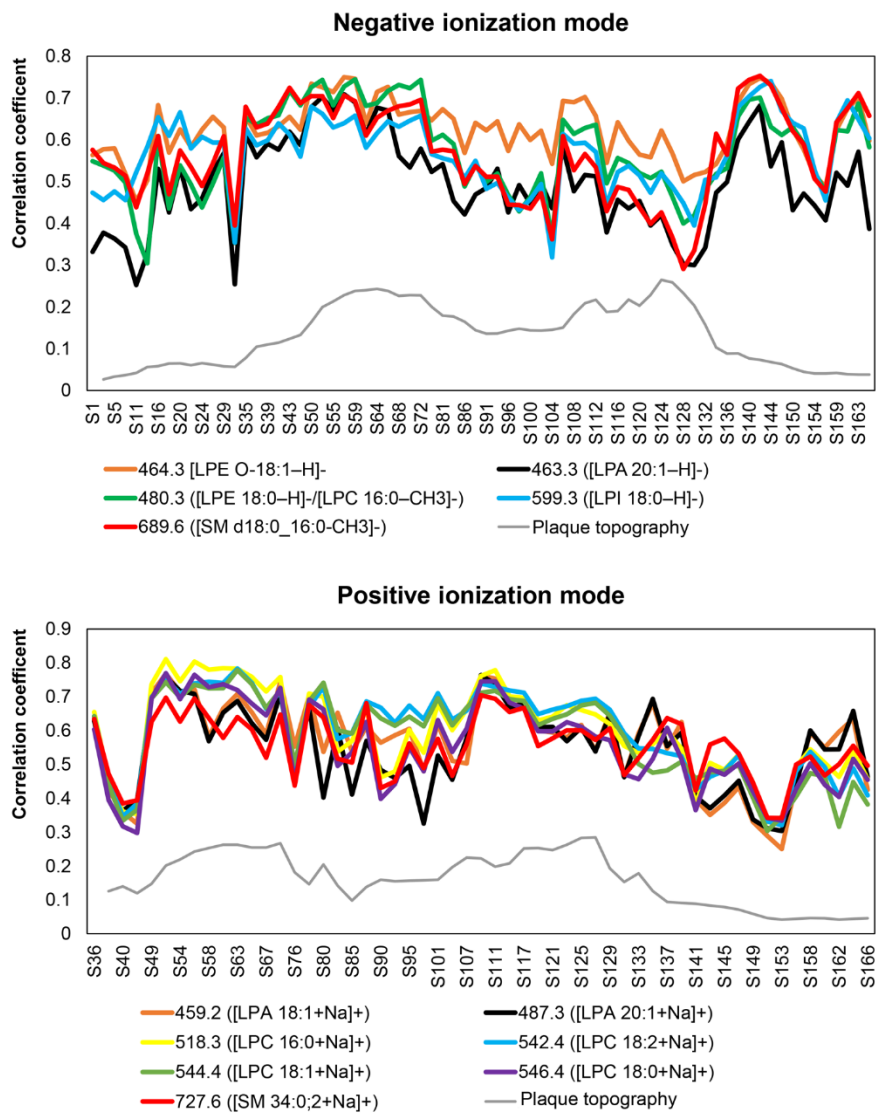

**Supplementary Fig. 24** Spatial distribution of several cholesteryl esters.

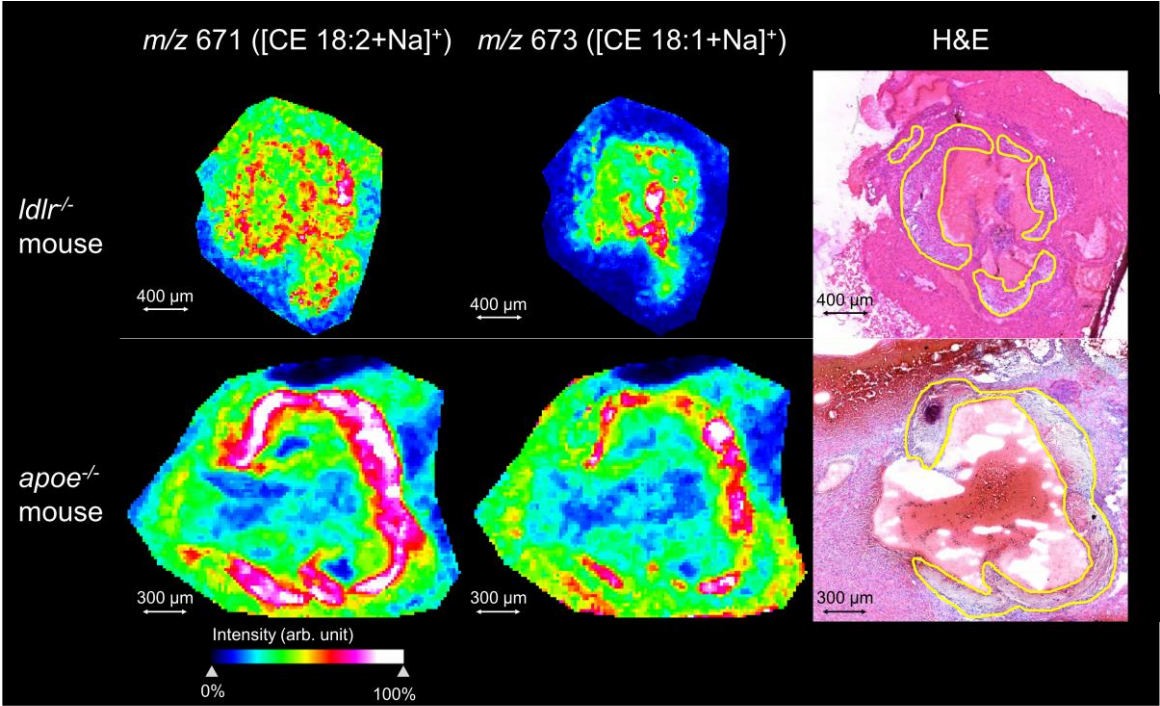

**Supplementary Fig. 25** Spatial distribution of several oxysterols.

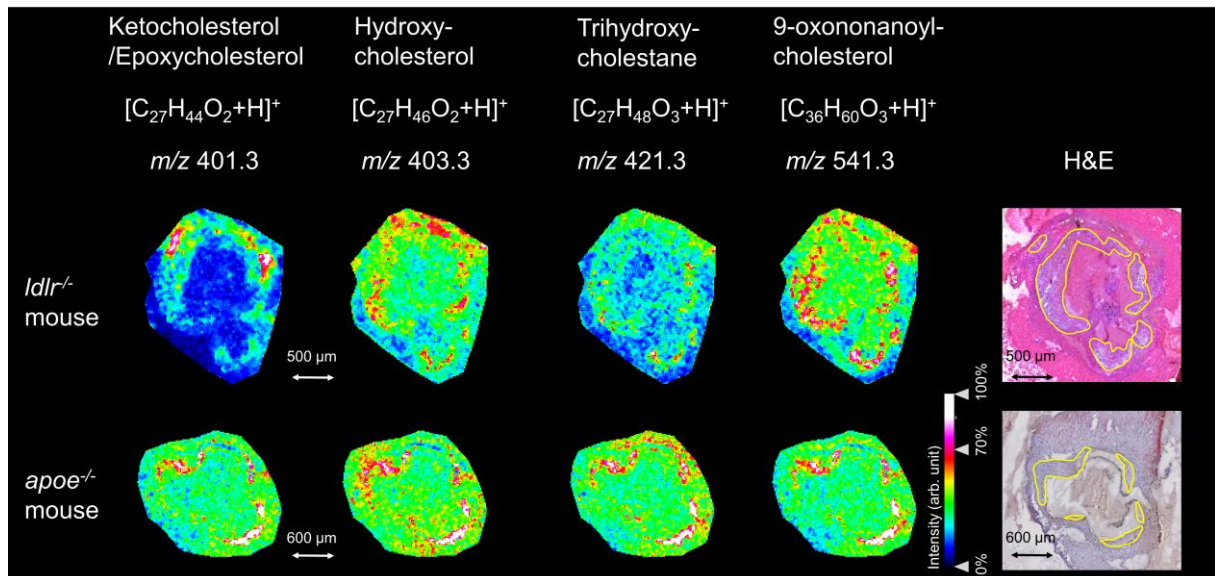

**Supplementary Fig 26** Sphingomyelin 34:0 is detected in both ionization modes.

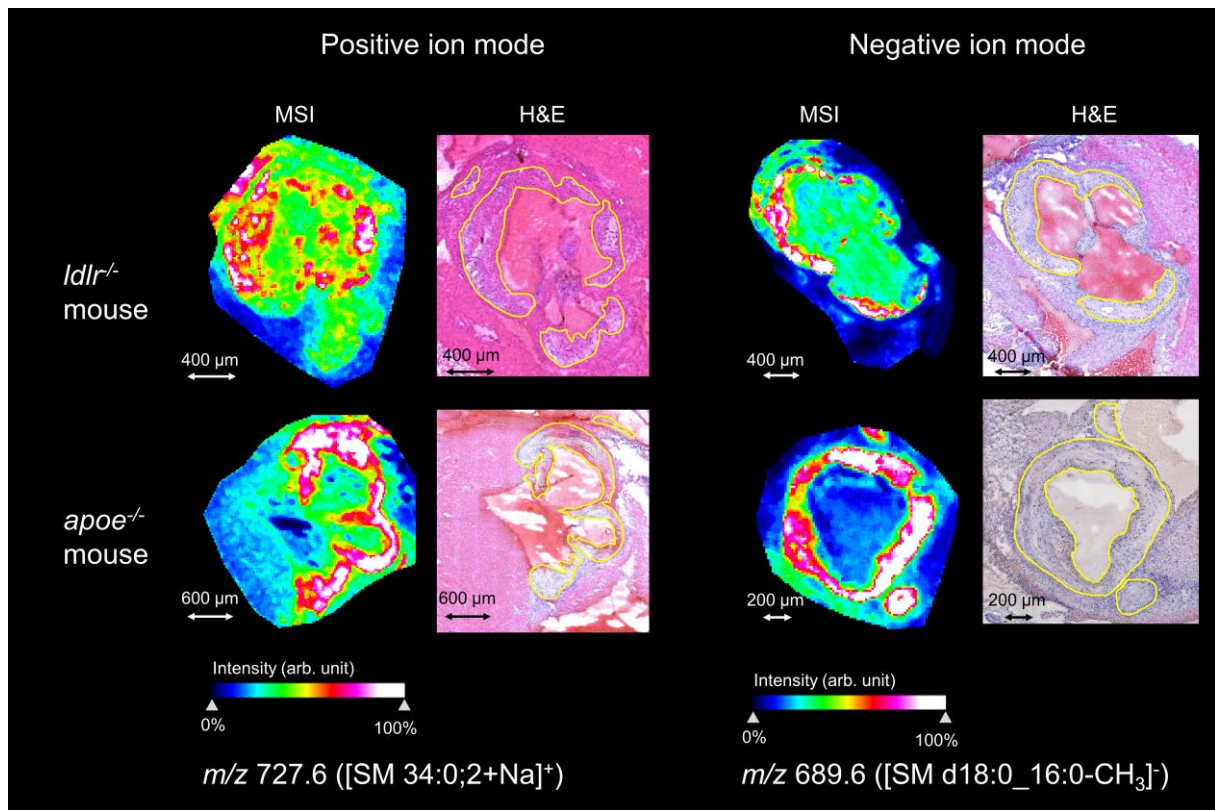

Supplement: js0c00070_si_001.pdf [file js0c00070_si_001.pdf]
